# Supplementary material
Source: Springer Nature journal article supplement (https://www.springermedizin.de/resource/supplementary/12878_2013_13_MOESM1_ESM.pdf/9686372)

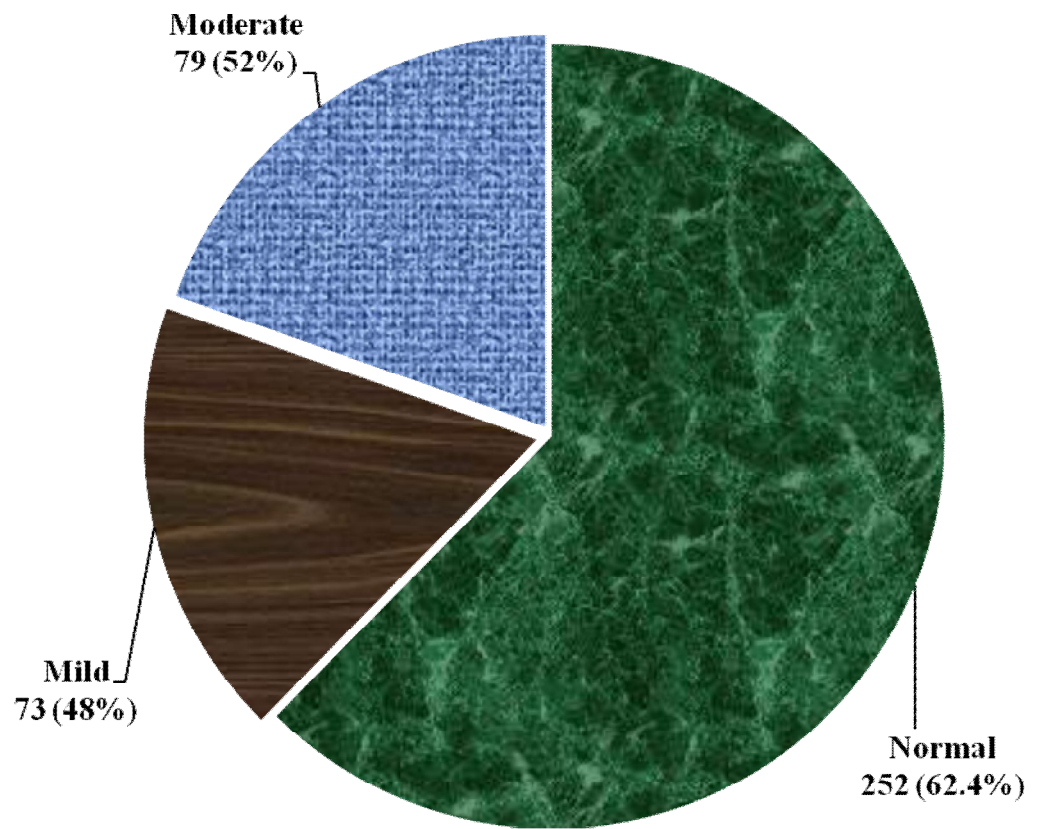

**Figure 1:** Severity of anemia in School children, Jimma town, southwest Ethiopia, 2011.

Supplement: MOESM1 [file 9686372]
